# Supplementary material for: How does the functional diversity of frugivorous birds shape the spatial pattern of seed dispersal? A case study in a relict plant species
Source: PubMed Central journal article supplement (PMC4843700; doi:10.1098/rstb.2015.0280), 2016-05-19
Supplement: rstb20150280supp1.pdf [file rstb20150280supp1.pdf]

## Supporting Information

**Table S1:** Summary data of *Taxus baccata* trees sampled at our study site.

| Identity | Gender | Location | Coord X   | Coord Y    |
|----------|--------|----------|-----------|------------|
| C001     | female | out      | 511632.63 | 4197793.62 |
| C002     | female | out      | 511763.1  | 4197869.26 |
| C003     | NR     | out      | 511740.11 | 4197877.95 |
| C004     | female | in       | 511821.7  | 4197993.81 |
| C005     | female | in       | 511828.58 | 4198016.94 |
| C006     | female | in       | 511823.52 | 4198022.0  |
| C007     | female | in       | 511849.03 | 4198099.35 |
| C008     | female | in       | 511839.85 | 4198108.07 |
| C009     | male   | in       | 511766.07 | 4197967.3  |
| C010     | female | in       | 511760.13 | 4197978.07 |
| C011     | NR     | in       | 511749.9  | 4197969.98 |
| C012     | NR     | in       | 511751.67 | 4197970.1  |
| C013     | NR     | in       | 511753.25 | 4197974.19 |
| C014     | NR     | in       | 511753.93 | 4197975.82 |
| C015     | NR     | in       | 511752.52 | 4197977.78 |
| C016     | NR     | in       | 511753.66 | 4197980.47 |
| C017     | female | in       | 511740.6  | 4197969.87 |
| C018     | NR     | in       | 511761.27 | 4197988.6  |
| C019     | male   | in       | 511726.32 | 4198016.25 |
| C021     | female | in       | 511742.22 | 4198028.93 |
| C022     | male   | in       | 511757.11 | 4198030.39 |
| C023     | female | in       | 511758.71 | 4198031.18 |
| C024     | female | in       | 511752.92 | 4198010.7  |
| C025     | female | in       | 511786.07 | 4198042.22 |
| C026     | female | in       | 511777.3  | 4198065.52 |
| C027     | NR     | in       | 511776.81 | 4198072.65 |
| C028     | NR     | in       | 511800.76 | 4198067.29 |
| C029     | NR     | in       | 511804.75 | 4198066.74 |
| C030     | female | in       | 511833.03 | 4198057.96 |
| C031     | NR     | in       | 511821.67 | 4198062.87 |
| C032     | male   | in       | 511786.24 | 4198018.67 |
| C033     | female | in       | 511797.99 | 4198030.07 |
| C034     | NR     | in       | 511774.07 | 4198024.31 |
| C035     | female | in       | 511783.09 | 4198036.79 |
| C036     | NR     | in       | 511779.21 | 4198045.95 |

*Continued on next page*

Table S1 – *Extended*

| Identity | Gender <sup>1</sup> | Location <sup>2</sup> | Coord X <sup>3</sup> | Coord Y <sup>3</sup> |
|----------|---------------------|-----------------------|----------------------|----------------------|
| C037     | male                | in                    | 511788.75            | 4198038.99           |
| C038     | NR                  | in                    | 511779.55            | 4197966.32           |
| C039     | NR                  | in                    | 511787.5             | 4198039.47           |
| C040     | NR                  | in                    | 511808.76            | 4198046.26           |
| C041     | female              | in                    | 511763.85            | 4198038.86           |
| C042     | NR                  | in                    | 511730.44            | 4198011.48           |
| C043     | NR                  | in                    | 511853.96            | 4198370.89           |
| C044     | NR                  | in                    | 511714.39            | 4198040.42           |
| C045     | NR                  | in                    | 511759.92            | 4197977.88           |
| C046     | NR                  | in                    | 511779.15            | 4198064.96           |
| C047     | male                | in                    | 511820.23            | 4198106.08           |
| C048     | NR                  | in                    | 511654.56            | 4198083.72           |
| C049     | NR                  | in                    | 511698.52            | 4198054.05           |
| C050     | NR                  | in                    | 511716.02            | 4198056.98           |
| C051     | NR                  | in                    | 511759.57            | 4198095.52           |
| C052     | NR                  | in                    | 511787.49            | 4198082.25           |
| C053     | female              | in                    | 511803.16            | 4198078.07           |
| C054     | NR                  | in                    | 511822.36            | 4198096.67           |
| C055     | NR                  | in                    | 511821.53            | 4198095.24           |
| C056     | NR                  | in                    | 511819.19            | 4198091.56           |
| C057     | NR                  | in                    | 511714.79            | 4198003.75           |
| C058     | NR                  | in                    | 511751.13            | 4198012.52           |
| C059     | NR                  | in                    | 511709.89            | 4198008.59           |
| C060     | NR                  | in                    | 511767.78            | 4198024.28           |
| C061     | female              | in                    | 511756.88            | 4198044.86           |
| C062     | NR                  | in                    | 511797.41            | 4198063.24           |
| C063     | NR                  | in                    | 511709.83            | 4198008.24           |
| C064     | NR                  | in                    | 511730.72            | 4198056.46           |
| C065     | NR                  | in                    | 511731.22            | 4198055.75           |
| C066     | NR                  | in                    | 511736.41            | 4198057.94           |
| C067     | NR                  | in                    | 511737.89            | 4198059.04           |
| C068     | NR                  | in                    | 511738.42            | 4198058.7            |
| C069     | NR                  | in                    | 511739.12            | 4198058.85           |
| C070     | NR                  | in                    | 511739.62            | 4198058.71           |
| C071     | NR                  | in                    | 511740.17            | 4198058.91           |
| C072     | NR                  | in                    | 511772.6             | 4198041.7            |
| C073     | NR                  | in                    | 511770.99            | 4198051.16           |
| C074     | NR                  | in                    | 511771.01            | 4198040.71           |

*Continued on next page*

Table S1 – *Extended*

| Identity | Gender <sup>1</sup> | Location <sup>2</sup> | Coord X <sup>3</sup> | Coord Y <sup>3</sup> |
|----------|---------------------|-----------------------|----------------------|----------------------|
| C075     | NR                  | in                    | 511771.76            | 4197995.11           |
| C076     | NR                  | in                    | 511756.11            | 4197984.72           |
| C077     | NR                  | in                    | 511756.79            | 4197984.66           |
| C078     | NR                  | in                    | 511756.84            | 4197983.54           |
| C079     | NR                  | in                    | 511751.93            | 4197977.51           |
| C080     | NR                  | in                    | 511751.45            | 4197964.27           |
| C081     | NR                  | in                    | 511751.98            | 4197965.57           |
| C082     | NR                  | in                    | 511856.39            | 4198137.8            |
| C083     | NR                  | in                    | 511671.94            | 4198090.79           |
| C084     | NR                  | in                    | 511715.62            | 4198040.88           |
| C085     | NR                  | in                    | 511716.84            | 4198041.38           |
| C086     | NR                  | in                    | 511718.83            | 4198041.3            |
| C087     | NR                  | in                    | 511716.6             | 4198040.93           |
| C088     | NR                  | in                    | 511724.54            | 4198045.17           |
| C089     | NR                  | in                    | 511755.88            | 4198010.78           |
| C090     | NR                  | in                    | 511752.54            | 4198011.26           |
| C091     | NR                  | in                    | 511752.56            | 4198011.83           |
| C092     | NR                  | in                    | 511771.95            | 4197993.61           |
| C093     | NR                  | in                    | 511766.53            | 4197995.15           |
| C094     | NR                  | in                    | 511761.25            | 4197994.32           |
| C095     | NR                  | in                    | 511763.15            | 4197995.97           |
| C096     | NR                  | in                    | 511763.05            | 4197994.26           |
| C097     | NR                  | in                    | 511758.69            | 4197995.96           |
| C098     | NR                  | in                    | 511709.7             | 4198008.89           |
| C099     | female              | in                    | 511791.73            | 4198136.85           |
| C100     | NR                  | in                    | 511756.9             | 4198031.9            |
| C101     | NR                  | in                    | 511762.45            | 4197950.71           |
| C102     | NR                  | in                    | 511749.92            | 4198010.63           |
| C103     | NR                  | in                    | 511841.53            | 4198061.61           |
| C104     | NR                  | in                    | 511785.16            | 4198083.46           |
| C105     | female              | in                    | 511808.96            | 4198011.49           |
| C106     | NR                  | in                    | 511766.98            | 4197994.92           |
| C107     | NR                  | out                   | 511791.07            | 4197751.24           |
| C108     | NR                  | out                   | 511757.61            | 4197870.63           |
| C109     | male                | out                   | 512081.4             | 4198087.63           |
| C110     | male                | out                   | 512052.2             | 4198122.81           |
| C111     | female              | out                   | 512083.4             | 4198139.96           |
| C112     | male                | out                   | 512086.83            | 4198186.25           |

*Continued on next page*

Table S1 – *Extended*

| Identity | Gender <sup>1</sup> | Location <sup>2</sup> | Coord X <sup>3</sup> | Coord Y <sup>3</sup> |
|----------|---------------------|-----------------------|----------------------|----------------------|
| C113     | male                | out                   | 512082.15            | 4198204.05           |
| C114     | female              | out                   | 512059.7             | 4198183.11           |
| C115     | female              | out                   | 512533.12            | 4198693.67           |
| C116     | female              | out                   | 512542.1             | 4198701.85           |
| C117     | male                | out                   | 512510.04            | 4198650.62           |

<sup>1</sup> NR: not reproductive.

<sup>2</sup> Either inside the fenced area, *in*, or outside of it, *out*; see Fig. 1B for a map of these areas.

<sup>3</sup> Geographic coordinates, in UTM.

**Table S2:** Maternal composition of the seed rain analysed within each seed-plot.

| Seed-plot | Microhabitat <sup>1</sup> | Seeds <sup>2</sup> | Self ( <i>n</i> ) <sup>3</sup> | Local ( <i>n</i> ) <sup>3</sup> | Outside ( <i>n</i> ) <sup>3</sup> | Coord X <sup>4</sup> | Coord Y <sup>4</sup> |
|-----------|---------------------------|--------------------|--------------------------------|---------------------------------|-----------------------------------|----------------------|----------------------|
| F01       | F                         | 0                  | -                              | -                               | -                                 | 511844.49            | 4198154.24           |
| F02       | F                         | 0                  | -                              | -                               | -                                 | 511830.8             | 4198144.47           |
| F04       | F                         | 0                  | -                              | -                               | -                                 | 511812.33            | 4198142.84           |
| F05       | F                         | 0                  | -                              | -                               | -                                 | 511821.18            | 4198155.95           |
| F06       | F                         | 0                  | -                              | -                               | -                                 | 511808.91            | 4198132.05           |
| F08       | F                         | 2                  | -                              | C023 (2)                        | -                                 | 511809.24            | 4198134.89           |
| F10       | F                         | 0                  | -                              | -                               | -                                 | 511780.94            | 4198146.89           |
| F11       | F                         | 0                  | -                              | -                               | -                                 | 511759.3             | 4198137.96           |
| F12       | F                         | 2                  | -                              | C007 (1)                        | new1 (1)                          | 511768.03            | 4198090.86           |
| F14       | F                         | 0                  | -                              | -                               | -                                 | 511732.56            | 4198093.68           |
| F16       | F                         | 0                  | -                              | -                               | -                                 | 511703.43            | 4198084.6            |
| F20       | F                         | 1                  | -                              | C007 (1)                        | -                                 | 511861.17            | 4198127.4            |
| F22       | F                         | 1                  | -                              | C007 (1)                        | -                                 | 511868.35            | 4198132.76           |
| F25       | F                         | 2                  | -                              | C007 (2)                        | -                                 | 511853.66            | 4198084.94           |
| F26       | F                         | 2                  | -                              | -                               | C111 (1), new12 (1)               | 511846.53            | 4198082.03           |
| F27       | F                         | 8                  | -                              | C007 (6)                        | new1 (1), new12 (1)               | 511842.89            | 4198085.04           |
| F30       | F                         | 3                  | -                              | C007 (2)                        | new11 (1)                         | 511855.76            | 4198065.42           |
| F31       | F                         | 0                  | -                              | -                               | -                                 | 511844.83            | 4198048.64           |
| F32       | F                         | 0                  | -                              | -                               | -                                 | 511838.13            | 4198025.94           |
| F42       | F                         | 0                  | -                              | -                               | -                                 | 511756.13            | 4197948.37           |
| F48       | F                         | 2                  | -                              | C010 (2)                        | -                                 | 511755.64            | 4197974.04           |
| F49       | F                         | 0                  | -                              | -                               | -                                 | 511777.6             | 4197982.08           |
| F50       | F                         | 1                  | -                              | C007 (1)                        | -                                 | 511828.45            | 4198070.34           |
| F51       | F                         | 0                  | -                              | -                               | -                                 | 511759.28            | 4197947.34           |
| F52       | F                         | 1                  | -                              | C024 (1)                        | -                                 | 511764.75            | 4197951.43           |
| F56       | F                         | 0                  | -                              | -                               | -                                 | 511821.65            | 4198275.03           |
| F57       | F                         | 0                  | -                              | -                               | -                                 | 511824.92            | 4198289.53           |
| F60       | F                         | 0                  | -                              | -                               | -                                 | 511926.74            | 4198267.05           |
| F61       | F                         | 0                  | -                              | -                               | -                                 | 511913.75            | 4198254.38           |
| F62       | F                         | 0                  | -                              | -                               | -                                 | 511923.46            | 4198250.52           |
| F65       | F                         | 0                  | -                              | -                               | -                                 | 511918.79            | 4198359.11           |
| F68       | F                         | 0                  | -                              | -                               | -                                 | 511777.41            | 4198202.88           |
| F70       | F                         | 0                  | -                              | -                               | -                                 | 511704.62            | 4198146.87           |

*Continued on next page*

Table S2 – *Extended*

| Seed-plot | Microhabitat <sup>1</sup> | Seeds <sup>2</sup> | Self ( <i>n</i> ) <sup>3</sup> | Local ( <i>n</i> ) <sup>3</sup> | Outside ( <i>n</i> ) <sup>3</sup> | Coord X <sup>4</sup> | Coord Y <sup>4</sup> |
|-----------|---------------------------|--------------------|--------------------------------|---------------------------------|-----------------------------------|----------------------|----------------------|
| F72       | F                         | 0                  | -                              | -                               | -                                 | 511795.8             | 4198256.36           |
| F73       | F                         | 0                  | -                              | -                               | -                                 | 511860.89            | 4198187.62           |
| F74       | F                         | 0                  | -                              | -                               | -                                 | 511872.2             | 4198177.69           |
| F77       | F                         | 0                  | -                              | -                               | -                                 | 511866               | 4198361.35           |
| F78       | F                         | 0                  | -                              | -                               | -                                 | 511891.7             | 4198240.77           |
| F79       | F                         | 0                  | -                              | -                               | -                                 | 511821.75            | 4198098.7            |
| G02       | G                         | 0                  | -                              | -                               | -                                 | 511867.6234          | 4198153.3053         |
| G03       | G                         | 0                  | -                              | -                               | -                                 | 511874.3629          | 4198144.7273         |
| G04       | G                         | 0                  | -                              | -                               | -                                 | 511871.8329          | 4198165.3374         |
| G05       | G                         | 0                  | -                              | -                               | -                                 | 511864.7541          | 4198176.9794         |
| G06       | G                         | 0                  | -                              | -                               | -                                 | 511797.1219          | 4198211.3036         |
| G08       | G                         | 0                  | -                              | -                               | -                                 | 511809.0285          | 4198205.1538         |
| G09       | G                         | 0                  | -                              | -                               | -                                 | 511822.801           | 4198203.4157         |
| G10       | G                         | 0                  | -                              | -                               | -                                 | 511842.8619          | 4198194.8201         |
| G12       | G                         | 0                  | -                              | -                               | -                                 | 511860.8522          | 4198090.5603         |
| G14       | G                         | 0                  | -                              | -                               | -                                 | 511838.9367          | 4198029.5359         |
| G16       | G                         | 0                  | -                              | -                               | -                                 | 511810.8903          | 4198154.5258         |
| G18       | G                         | 0                  | -                              | -                               | -                                 | 511797.6082          | 4198167.0778         |
| G20       | G                         | 0                  | -                              | -                               | -                                 | 511787.0103          | 4198159.6835         |
| G23       | G                         | 0                  | -                              | -                               | -                                 | 511717.7305          | 4198087.5641         |
| G24       | G                         | 0                  | -                              | -                               | -                                 | 511732.1238          | 4198100.162          |
| G25       | G                         | 0                  | -                              | -                               | -                                 | 511783.2226          | 4198157.5158         |
| G26       | G                         | 0                  | -                              | -                               | -                                 | 511773.2314          | 4198145.0105         |
| G32       | G                         | 0                  | -                              | -                               | -                                 | 511745.198           | 4198142.062          |
| G34       | G                         | 0                  | -                              | -                               | -                                 | 511717.7251          | 4198154.6186         |
| G36       | G                         | 0                  | -                              | -                               | -                                 | 511705.6568          | 4198151.762          |
| G41       | G                         | 0                  | -                              | -                               | -                                 | 511833.0034          | 4198251.8234         |
| G45       | G                         | 0                  | -                              | -                               | -                                 | 511869.0884          | 4198243.0735         |
| G47       | G                         | 0                  | -                              | -                               | -                                 | 511840.5803          | 4198217.2323         |
| G50       | G                         | 0                  | -                              | -                               | -                                 | 511845.1121          | 4198223.2209         |
| G51       | G                         | 0                  | -                              | -                               | -                                 | 511829.5902          | 4198252.6999         |
| G54       | G                         | 0                  | -                              | -                               | -                                 | 511840.2192          | 4198302.954          |
| G56       | G                         | 0                  | -                              | -                               | -                                 | 511861.4615          | 4198327.8417         |
| G58       | G                         | 0                  | -                              | -                               | -                                 | 511831.4377          | 4198260.275          |

*Continued on next page*

Table S2 – *Extended*

| Seed-plot | Microhabitat <sup>1</sup> | Seeds <sup>2</sup> | Self ( <i>n</i> ) <sup>3</sup> | Local ( <i>n</i> ) <sup>3</sup> | Outside ( <i>n</i> ) <sup>3</sup> | Coord X <sup>4</sup> | Coord Y <sup>4</sup> |
|-----------|---------------------------|--------------------|--------------------------------|---------------------------------|-----------------------------------|----------------------|----------------------|
| G60       | G                         | 0                  | -                              | -                               | -                                 | 511848.6401          | 4198298.5162         |
| G61       | G                         | 0                  | -                              | -                               | -                                 | 511850.6102          | 4198232.3674         |
| G62       | G                         | 0                  | -                              | -                               | -                                 | 511855.3178          | 4198229.2724         |
| G64       | G                         | 0                  | -                              | -                               | -                                 | 511862.6124          | 4198234.423          |
| G69       | G                         | 0                  | -                              | -                               | -                                 | 511874.9074          | 4198243.0983         |
| G70       | G                         | 0                  | -                              | -                               | -                                 | 511873.3453          | 4198250.5636         |
| G71       | G                         | 0                  | -                              | -                               | -                                 | 511883.4243          | 4198253.7893         |
| G72       | G                         | 0                  | -                              | -                               | -                                 | 511885.7857          | 4198261.6813         |
| G73       | G                         | 0                  | -                              | -                               | -                                 | 511887.0084          | 4198265.6951         |
| G74       | G                         | 0                  | -                              | -                               | -                                 | 511899.7135          | 4198286.7406         |
| G76       | G                         | 0                  | -                              | -                               | -                                 | 511903.2872          | 4198290.231          |
| G78       | G                         | 0                  | -                              | -                               | -                                 | 511913.7251          | 4198301.5838         |
| N01       | N                         | 0                  | -                              | -                               | -                                 | 511830.79            | 4198138.89           |
| N02       | N                         | 5                  | -                              | C024 (4)                        | new12 (1)                         | 511827.27            | 4198135.5            |
| N03       | N                         | 0                  | -                              | -                               | -                                 | 511797.94            | 4198126.89           |
| N05       | N                         | 0                  | -                              | -                               | -                                 | 511777.39            | 4198142.79           |
| N11       | N                         | 0                  | -                              | -                               | -                                 | 511718.9             | 4198162.39           |
| N13       | N                         | 0                  | -                              | -                               | -                                 | 511707.37            | 4198136.08           |
| N15       | N                         | 0                  | -                              | -                               | -                                 | 511691.68            | 4198107.91           |
| N16       | N                         | 0                  | -                              | -                               | -                                 | 511692.31            | 4198092.98           |
| N17       | N                         | 2                  | -                              | C024 (2)                        | -                                 | 511730.31            | 4198077.7            |
| N22       | N                         | 1                  | -                              | C024 (1)                        | -                                 | 511779.34            | 4198091.92           |
| N28       | N                         | 0                  | -                              | -                               | -                                 | 511852.34            | 4198060.72           |
| N29       | N                         | 0                  | -                              | -                               | -                                 | 511830.34            | 4197999.69           |
| N32       | N                         | 0                  | -                              | -                               | -                                 | 511772.74            | 4197951.1            |
| N33       | N                         | 1                  | -                              | C010 (1)                        | -                                 | 511775.64            | 4197958.06           |
| N34       | N                         | 0                  | -                              | -                               | -                                 | 511779.35            | 4197946.35           |
| N36       | N                         | 0                  | -                              | -                               | -                                 | 511764.92            | 4197958.26           |
| N37       | N                         | 0                  | -                              | -                               | -                                 | 511764.87            | 4197990.49           |
| N38       | N                         | 0                  | -                              | -                               | -                                 | 511744.85            | 4197989.9            |
| N39       | N                         | 0                  | -                              | -                               | -                                 | 511733.5             | 4197981.16           |
| N40       | N                         | 6                  | -                              | C023 (1), C024 (5)              | -                                 | 511751.43            | 4198003.23           |
| N41       | N                         | 0                  | -                              | -                               | -                                 | 511815.21            | 4198198.9            |
| N42       | N                         | 0                  | -                              | -                               | -                                 | 511836.33            | 4198172.44           |

*Continued on next page*

Table S2 – *Extended*

| Seed-plot | Microhabitat <sup>1</sup> | Seeds <sup>2</sup> | Self ( <i>n</i> ) <sup>3</sup> | Local ( <i>n</i> ) <sup>3</sup> | Outside ( <i>n</i> ) <sup>3</sup> | Coord X <sup>4</sup> | Coord Y <sup>4</sup> |
|-----------|---------------------------|--------------------|--------------------------------|---------------------------------|-----------------------------------|----------------------|----------------------|
| N44       | N                         | 0                  | -                              | -                               | -                                 | 511857.38            | 4198159.77           |
| N45       | N                         | 0                  | -                              | -                               | -                                 | 511858.79            | 4198163.9            |
| N46       | N                         | 0                  | -                              | -                               | -                                 | 511835.45            | 4198139.15           |
| N47       | N                         | 1                  | -                              | -                               | new12 (1)                         | 511826.02            | 4198137.31           |
| N48       | N                         | 0                  | -                              | -                               | -                                 | 511797.87            | 4198122.43           |
| N51       | N                         | 1                  | -                              | C010 (1)                        | -                                 | 511782.62            | 4198085.06           |
| N56       | N                         | 0                  | -                              | -                               | -                                 | 511690.06            | 4198099.33           |
| N57       | N                         | 0                  | -                              | -                               | -                                 | 511660.3             | 4198078.76           |
| N60       | N                         | 0                  | -                              | -                               | -                                 | 511667.48            | 4198117.19           |
| N63       | N                         | 0                  | -                              | -                               | -                                 | 511783.42            | 4198233.75           |
| N65       | N                         | 0                  | -                              | -                               | -                                 | 511753.48            | 4198211.25           |
| N66       | N                         | 0                  | -                              | -                               | -                                 | 511740.64            | 4198198.15           |
| N68       | N                         | 0                  | -                              | -                               | -                                 | 511739.3             | 4198212.01           |
| N70       | N                         | 0                  | -                              | -                               | -                                 | 511745.3             | 4198189.13           |
| N73       | N                         | 0                  | -                              | -                               | -                                 | 511725.35            | 4198164.7            |
| N76       | N                         | 0                  | -                              | -                               | -                                 | 511692.37            | 4198123.08           |
| N79       | N                         | 0                  | -                              | -                               | -                                 | 511682.72            | 4198107.48           |
| N80       | N                         | 0                  | -                              | -                               | -                                 | 511683.51            | 4198105.4            |
| P01       | P                         | 0                  | -                              | -                               | -                                 | 511854.72            | 4198192.97           |
| P04       | P                         | 0                  | -                              | -                               | -                                 | 511843.61            | 4198240.69           |
| P05       | P                         | 0                  | -                              | -                               | -                                 | 511834.39            | 4198241.62           |
| P06       | P                         | 0                  | -                              | -                               | -                                 | 511839.68            | 4198253.55           |
| P07       | P                         | 0                  | -                              | -                               | -                                 | 511826.5             | 4198256.23           |
| P08       | P                         | 0                  | -                              | -                               | -                                 | 511810.58            | 4198272.08           |
| P10       | P                         | 0                  | -                              | -                               | -                                 | 511798.07            | 4198289.54           |
| P11       | P                         | 0                  | -                              | -                               | -                                 | 511834.21            | 4198294.3            |
| P12       | P                         | 0                  | -                              | -                               | -                                 | 511809.03            | 4198314.59           |
| P14       | P                         | 0                  | -                              | -                               | -                                 | 511853.79            | 4198330.94           |
| P15       | P                         | 0                  | -                              | -                               | -                                 | 511864.11            | 4198341.89           |
| P18       | P                         | 0                  | -                              | -                               | -                                 | 511854.15            | 4198395.91           |
| P20       | P                         | 0                  | -                              | -                               | -                                 | 511858.65            | 4198409.46           |
| P21       | P                         | 0                  | -                              | -                               | -                                 | 511903.41            | 4198394.4            |
| P22       | P                         | 0                  | -                              | -                               | -                                 | 511902.5             | 4198375.91           |
| P24       | P                         | 0                  | -                              | -                               | -                                 | 511896.74            | 4198373.18           |

*Continued on next page*



Table S2 – *Extended*

| Seed-plot | Microhabitat <sup>1</sup> | Seeds <sup>2</sup> | Self ( <i>n</i> ) <sup>3</sup> | Local ( <i>n</i> ) <sup>3</sup> | Outside ( <i>n</i> ) <sup>3</sup> | Coord X <sup>4</sup> | Coord Y <sup>4</sup> |
|-----------|---------------------------|--------------------|--------------------------------|---------------------------------|-----------------------------------|----------------------|----------------------|
| P26       | P                         | 0                  | -                              | -                               | -                                 | 511894.87            | 4198361.42           |
| P28       | P                         | 0                  | -                              | -                               | -                                 | 511898.31            | 4198342.01           |
| P29       | P                         | 0                  | -                              | -                               | -                                 | 511906.72            | 4198332.62           |
| P32       | P                         | 0                  | -                              | -                               | -                                 | 511893.33            | 4198321.52           |
| P33       | P                         | 0                  | -                              | -                               | -                                 | 511885.66            | 4198323.14           |
| P35       | P                         | 0                  | -                              | -                               | -                                 | 511883.66            | 4198305.12           |
| P36       | P                         | 0                  | -                              | -                               | -                                 | 511879.09            | 4198291.78           |
| P40       | P                         | 0                  | -                              | -                               | -                                 | 511892.15            | 4198298.11           |
| P42       | P                         | 1                  | -                              | -                               | new12 (1)                         | 511796.29            | 4198100.31           |
| P44       | P                         | 0                  | -                              | -                               | -                                 | 511785.95            | 4198093.96           |
| P47       | P                         | 0                  | -                              | -                               | -                                 | 511757.19            | 4198127.38           |
| P48       | P                         | 1                  | -                              | -                               | new13 (1)                         | 511746.64            | 4198120.73           |
| P52       | P                         | 3                  | -                              | C024 (3)                        | -                                 | 511713.16            | 4198065.98           |
| P54       | P                         | 2                  | -                              | C024 (4)                        | new14 (1)                         | 511699.38            | 4198071.12           |
| P56       | P                         | 8                  | -                              | C017 (3), C024 (4)              | new14 (1)                         | 511692.83            | 4198102.88           |
| P62       | P                         | 0                  | -                              | -                               | -                                 | 511802.17            | 4198142.39           |
| P64       | P                         | 0                  | -                              | -                               | -                                 | 511773.91            | 4198171.38           |
| P68       | P                         | 0                  | -                              | -                               | -                                 | 511766.97            | 4198170.69           |
| P69       | P                         | 0                  | -                              | -                               | -                                 | 511752.32            | 4198180.11           |
| P71       | P                         | 0                  | -                              | -                               | -                                 | 511843.25            | 4198141.31           |
| P76       | P                         | 2                  | -                              | C007 (2)                        | -                                 | 511840.09            | 4198135.09           |
| P77       | P                         | 0                  | -                              | -                               | -                                 | 511836.05            | 4198153.98           |
| P78       | P                         | 0                  | -                              | -                               | -                                 | 511828.19            | 4198152.51           |
| P80       | P                         | 0                  | -                              | -                               | -                                 | 511803.21            | 4198159.52           |
| R02       | R                         | 0                  | -                              | -                               | -                                 | 511862.68            | 4198138.18           |
| R03       | R                         | 0                  | -                              | -                               | -                                 | 511862.42            | 4198139.88           |
| R04       | R                         | 0                  | -                              | -                               | -                                 | 511859.07            | 4198137.36           |
| R08       | R                         | 0                  | -                              | -                               | -                                 | 511858.7             | 4198111.54           |
| R09       | R                         | 0                  | -                              | -                               | -                                 | 511866.33            | 4198110.99           |
| R10       | R                         | 1                  | -                              | C007 (1)                        | -                                 | 511866.48            | 4198108.43           |
| R14       | R                         | 0                  | -                              | -                               | -                                 | 511821.68            | 4198096.86           |
| R15       | R                         | 0                  | -                              | -                               | -                                 | 511820.33            | 4198097.17           |
| R17       | R                         | 0                  | -                              | -                               | -                                 | 511788.5             | 4197971              |
| R18       | R                         | 0                  | -                              | -                               | -                                 | 511790.3             | 4197972.45           |

*Continued on next page*

Table S2 – *Extended*

| Seed-plot | Microhabitat <sup>1</sup> | Seeds <sup>2</sup> | Self ( <i>n</i> ) <sup>3</sup> | Local ( <i>n</i> ) <sup>3</sup> | Outside ( <i>n</i> ) <sup>3</sup> | Coord X <sup>4</sup> | Coord Y <sup>4</sup> |
|-----------|---------------------------|--------------------|--------------------------------|---------------------------------|-----------------------------------|----------------------|----------------------|
| R19       | R                         | 1                  | -                              | C021 (1)                        | -                                 | 511792.39            | 4197967.78           |
| R20       | R                         | 0                  | -                              | -                               | -                                 | 511786.3             | 4197965.26           |
| R21       | R                         | 1                  | -                              | C010 (1)                        | -                                 | 511761.63            | 4197985.57           |
| R23       | R                         | 0                  | -                              | -                               | -                                 | 511754.21            | 4197988.13           |
| R29       | R                         | 0                  | -                              | -                               | -                                 | 511753.12            | 4198027.97           |
| R31       | R                         | 0                  | -                              | -                               | -                                 | 511684.47            | 4198040.69           |
| R33       | R                         | 0                  | -                              | -                               | -                                 | 511689.23            | 4198033.69           |
| R34       | R                         | 0                  | -                              | -                               | -                                 | 511692.33            | 4198029.51           |
| R38       | R                         | 0                  | -                              | -                               | -                                 | 511705.31            | 4198015.91           |
| R42       | R                         | 0                  | -                              | -                               | -                                 | 511831.18            | 4198147.05           |
| R44       | R                         | 0                  | -                              | -                               | -                                 | 511824.59            | 4198144.79           |
| R45       | R                         | 0                  | -                              | -                               | -                                 | 511821.95            | 4198141.21           |
| R47       | R                         | 0                  | -                              | -                               | -                                 | 511878.22            | 4198198.52           |
| R50       | R                         | 0                  | -                              | -                               | -                                 | 511883.09            | 4198199.65           |
| R54       | R                         | 0                  | -                              | -                               | -                                 | 511879.57            | 4198211.01           |
| R56       | R                         | 0                  | -                              | -                               | -                                 | 511883.31            | 4198212.31           |
| R58       | R                         | 0                  | -                              | -                               | -                                 | 511884.01            | 4198215.05           |
| R60       | R                         | 0                  | -                              | -                               | -                                 | 511885               | 4198217.22           |
| R63       | R                         | 0                  | -                              | -                               | -                                 | 511892.26            | 4198217.97           |
| R65       | R                         | 0                  | -                              | -                               | -                                 | 511883.11            | 4198226.41           |
| R67       | R                         | 0                  | -                              | -                               | -                                 | 511885.64            | 4198238.05           |
| R68       | R                         | 0                  | -                              | -                               | -                                 | 511896.14            | 4198243.96           |
| R70       | R                         | 0                  | -                              | -                               | -                                 | 511889.82            | 4198251.61           |
| R71       | R                         | 0                  | -                              | -                               | -                                 | 511869.59            | 4198342.05           |
| R72       | R                         | 0                  | -                              | -                               | -                                 | 511873.47            | 4198350.58           |
| R73       | R                         | 0                  | -                              | -                               | -                                 | 511877.62            | 4198354.1            |
| R74       | R                         | 0                  | -                              | -                               | -                                 | 511881.56            | 4198356.75           |
| R75       | R                         | 0                  | -                              | -                               | -                                 | 511883.43            | 4198354.96           |
| R76       | R                         | 0                  | -                              | -                               | -                                 | 511878.82            | 4198363.93           |
| R77       | R                         | 0                  | -                              | -                               | -                                 | 511882.09            | 4198366.23           |
| S02       | S                         | 1                  | -                              | -                               | new12 (1)                         | 511868.33            | 4198139.65           |
| S04       | S                         | 0                  | -                              | -                               | -                                 | 511842.78            | 4198140.36           |
| S07       | S                         | 0                  | -                              | -                               | -                                 | 511765.57            | 4198177.2            |
| S08       | S                         | 0                  | -                              | -                               | -                                 | 511770.18            | 4198139.39           |

*Continued on next page*

Table S2 – *Extended*

| Seed-plot | Microhabitat <sup>1</sup> | Seeds <sup>2</sup> | Self ( <i>n</i> ) <sup>3</sup> | Local ( <i>n</i> ) <sup>3</sup> | Outside ( <i>n</i> ) <sup>3</sup> | Coord X <sup>4</sup> | Coord Y <sup>4</sup> |
|-----------|---------------------------|--------------------|--------------------------------|---------------------------------|-----------------------------------|----------------------|----------------------|
| S10       | S                         | 0                  | -                              | -                               | -                                 | 511743.2             | 4198105.89           |
| S11       | S                         | 0                  | -                              | -                               | -                                 | 511781.42            | 4198127.3            |
| S12       | S                         | 0                  | -                              | -                               | -                                 | 511761.87            | 4198132.94           |
| S14       | S                         | 0                  | -                              | -                               | -                                 | 511739.56            | 4198090.94           |
| S15       | S                         | 0                  | -                              | -                               | -                                 | 511733.69            | 4198089.41           |
| S16       | S                         | 0                  | -                              | -                               | -                                 | 511824.21            | 4197975.86           |
| S17       | S                         | 1                  | -                              | C007 (1)                        | -                                 | 511830.86            | 4198027.28           |
| S19       | S                         | 0                  | -                              | -                               | -                                 | 511871.93            | 4198135.77           |
| S20       | S                         | 0                  | -                              | -                               | -                                 | 511884.53            | 4198153.57           |
| S22       | S                         | 0                  | -                              | -                               | -                                 | 511813.28            | 4198151.1            |
| S24       | S                         | 0                  | -                              | -                               | -                                 | 511807.39            | 4198142.77           |
| S25       | S                         | 0                  | -                              | -                               | -                                 | 511751.62            | 4198143.23           |
| S28       | S                         | 0                  | -                              | -                               | -                                 | 511743.97            | 4198092.42           |
| S29       | S                         | 0                  | -                              | -                               | -                                 | 511708.03            | 4198073.57           |
| S37       | S                         | 0                  | -                              | -                               | -                                 | 511833.67            | 4198030.62           |
| S40       | S                         | 0                  | -                              | -                               | -                                 | 511877.39            | 4198162.51           |
| S42       | S                         | 0                  | -                              | -                               | -                                 | 511828.01            | 4198258.46           |
| S44       | S                         | 0                  | -                              | -                               | -                                 | 511816.16            | 4198278.36           |
| S46       | S                         | 0                  | -                              | -                               | -                                 | 511824.18            | 4198279.76           |
| S47       | S                         | 0                  | -                              | -                               | -                                 | 511832.3             | 4198305.48           |
| S48       | S                         | 0                  | -                              | -                               | -                                 | 511839               | 4198306.49           |
| S50       | S                         | 0                  | -                              | -                               | -                                 | 511832.54            | 4198337.89           |
| S52       | S                         | 0                  | -                              | -                               | -                                 | 511843.04            | 4198350.62           |
| S54       | S                         | 0                  | -                              | -                               | -                                 | 511832.61            | 4198374.72           |
| S55       | S                         | 0                  | -                              | -                               | -                                 | 511841.5             | 4198379.48           |
| S56       | S                         | 0                  | -                              | -                               | -                                 | 511838.13            | 4198384.75           |
| S57       | S                         | 0                  | -                              | -                               | -                                 | 511843.86            | 4198393.75           |
| S60       | S                         | 0                  | -                              | -                               | -                                 | 511850.24            | 4198421.06           |
| S65       | S                         | 0                  | -                              | -                               | -                                 | 511873.24            | 4198399.57           |
| S69       | S                         | 0                  | -                              | -                               | -                                 | 511891.06            | 4198393.32           |
| S71       | S                         | 0                  | -                              | -                               | -                                 | 511843.59            | 4198301.07           |
| S72       | S                         | 0                  | -                              | -                               | -                                 | 511856               | 4198289.96           |
| S73       | S                         | 0                  | -                              | -                               | -                                 | 511858.53            | 4198278.26           |
| S75       | S                         | 0                  | -                              | -                               | -                                 | 511822.94            | 4197997.71           |

*Continued on next page*

Table S2 – *Extended*

| Seed-plot | Microhabitat <sup>1</sup> | Seeds <sup>2</sup> | Self ( <i>n</i> ) <sup>3</sup> | Local ( <i>n</i> ) <sup>3</sup> | Outside ( <i>n</i> ) <sup>3</sup>                                    | Coord X <sup>4</sup> | Coord Y <sup>4</sup> |
|-----------|---------------------------|--------------------|--------------------------------|---------------------------------|----------------------------------------------------------------------|----------------------|----------------------|
| S76       | S                         | 0                  | -                              | -                               | -                                                                    | 511817.38            | 4197992.77           |
| S80       | S                         | 1                  | -                              | -                               | new15 (1)                                                            | 511758.04            | 4197956.83           |
| TF01      | TF                        | 0                  | -                              | -                               | -                                                                    | 511821.43            | 4197994.1            |
| TF02      | TF                        | 0                  | -                              | -                               | -                                                                    | 511821.13            | 4197993.64           |
| TF03      | TF                        | 1                  | -                              | C004 (1)                        | -                                                                    | 511828.58            | 4198016.94           |
| TF04      | TF                        | 0                  | -                              | -                               | -                                                                    | 511828.58            | 4198016.94           |
| TF05      | TF                        | 5                  | -                              | -                               | new16 (5)                                                            | 511822.63            | 4198022.56           |
| TF06      | TF                        | 0                  | -                              | -                               | -                                                                    | 511823.04            | 4198021.48           |
| TF07      | TF                        | 5                  | C007 (3)                       | -                               | C111 (1), new21 (1)                                                  | 511853.15            | 4198099.66           |
| TF08      | TF                        | 6                  | C007 (5)                       | -                               | new21 (1)                                                            | 511847.95            | 4198098.23           |
| TF11      | TF                        | 6                  | C010 (4)                       | C024 (1)                        | new22 (1)                                                            | 511761.4             | 4197979.73           |
| TF12      | TF                        | 5                  | C010 (4)                       | C024 (1)                        | -                                                                    | 511762.59            | 4197976.68           |
| TF13      | TF                        | 6                  | C017 (2)                       | C010 (1)                        | new23 (1), new24 (2)                                                 | 511740.02            | 4197970.6            |
| TF14      | TF                        | 5                  | C017 (1)                       | C010 (1)                        | new25 (1), new26 (1),<br>new27 (1)                                   | 511739.95            | 4197968.18           |
| TF17      | TF                        | 3                  | -                              | -                               | new28 (1), new29 (1),<br>new31 (1)                                   | 511740.08            | 4198024.29           |
| TF18      | TF                        | 6                  | -                              | -                               | new30 (1), new32 (1),<br>new33 (2), new34 (1),<br>new36 (1)          | 511738.23            | 4198025.21           |
| TF19      | TF                        | 1                  | C021 (1)                       | -                               | -                                                                    | 511744.47            | 4198029.4            |
| TF20      | TF                        | 5                  | C021 (1)                       | C024 (1)                        | new35 (1), new37 (1),<br>new38 (1)                                   | 511741.86            | 4198029.71           |
| TF23      | TF                        | 5                  | C023 (4)                       | C021 (1)                        | -                                                                    | 511759.36            | 4198030.81           |
| TF24      | TF                        | 6                  | C023 (3)                       | C024 (1)                        | C111 (1), new39 (1)                                                  | 511758.79            | 4198032.07           |
| TF25      | TF                        | 21                 | C024 (10)                      | C007 (1), C010 (4)              | new6 (1), new9 (1),<br>new10 (1), new11 (1),<br>new12 (1), new47 (1) | 511754.32            | 4198009.88           |
| TF26      | TF                        | 18                 | C024 (11)                      | C007 (1), C021 (1),<br>C023 (1) | new17 (2), new18 (1),<br>new19 (1)                                   | 511752.51            | 4198012.35           |
| TF27      | TF                        | 6                  | C025 (2)                       | C007 (1)                        | new13 (1), new40 (1),<br>new41 (1)                                   | 511783.86            | 4198042.09           |
| TF28      | TF                        | 6                  | C025 (3)                       | -                               | new40 (1), new42 (1), (1),<br>new43 (1)                              | 511787.28            | 4198041.8            |
|           |                           |                    |                                |                                 |                                                                      | 511787.28            | 4198041.8            |

*Continued on next page*

Table S2 – *Extended*

| Seed-plot | Microhabitat <sup>1</sup> | Seeds <sup>2</sup> | Self ( <i>n</i> ) <sup>3</sup> | Local ( <i>n</i> ) <sup>3</sup> | Outside ( <i>n</i> ) <sup>3</sup>                        | Coord X <sup>4</sup> | Coord Y <sup>4</sup> |
|-----------|---------------------------|--------------------|--------------------------------|---------------------------------|----------------------------------------------------------|----------------------|----------------------|
| TF29      | TF                        | 0                  | -                              | -                               | -                                                        | 511777.56            | 4198065.23           |
| TF30      | TF                        | 4                  | C026 (4)                       | -                               | -                                                        | 511776.92            | 4198065.96           |
| TF33      | TF                        | 0                  | -                              | -                               | -                                                        | 511833.02            | 4198057.53           |
| TF34      | TF                        | 0                  | -                              | -                               | -                                                        | 511832.83            | 4198059.14           |
| TF37      | TF                        | 8                  | C033 (1)                       | C024 (6)                        | new7 (1)                                                 | 511797.62            | 4198029.29           |
| TF38      | TF                        | 6                  | -                              | C024 (1)                        | new6 (1), new7 (1),<br>new44 (1), new45 (1)<br>new46 (1) | 511797.28            | 4198030.51           |
| TM09      | TM                        | 18                 | -                              | C010 (14)                       | new48 (1), new49 (1),<br>new50 (1), new51 (1)            | 511766.83            | 4197965.46           |
| TM10      | TM                        | 7                  | -                              | C010 (6), C024 (1)              | -                                                        | 511764.89            | 4197968.06           |
| TM15      | TM                        | 9                  | -                              | C010 (1), C023 (2)              | new2 (1), new3 (1),<br>new5 (1), new30 (2),<br>new33 (1) | 511725.18            | 4198016.18           |
| TM16      | TM                        | 4                  | -                              | C024 (1)                        | new2 (1), new4 (2)                                       | 511727.23            | 4198016.17           |
| TM21      | TM                        | 10                 | -                              | C021 (1), C023 (4),<br>C024 (4) | new8 (1)                                                 | 511756.7             | 4198031.23           |
| TM22      | TM                        | 5                  | -                              | C021 (1), C023 (1),<br>C024 (1) | new6 (1), new7 (1)                                       | 511756.09            | 4198030.01           |
| TM31      | TM                        | 0                  | -                              | -                               | -                                                        | 511780.12            | 4198046.7            |
| TM32      | TM                        | 1                  | -                              | -                               | new20 (1)                                                | 511788.75            | 4198038.99           |
| TM35      | TM                        | 0                  | -                              | -                               | -                                                        | 511787.84            | 4198018.71           |
| TM36      | TM                        | 1                  | -                              | C024 (1) -                      | -                                                        | 511786.17            | 4198017.77           |

<sup>1</sup> TF: *Taxus baccata* female tree; TM: *Taxus baccata* male tree; F: fleshy-fruited tree; N: non fleshy-fruited tree; G: open ground; R: rock; S: shrub.

<sup>2</sup> Total number of seeds analysed within individual seed-plots

<sup>3</sup> Identity of the mother trees that contributed seeds to the seed-plots. Self: seeds from the mother tree under which the seed-plot is located; local: seeds from a mother tree within the population; outside: seeds from a mother tree located outside the fence; number of seeds contributed by each mother tree in brackets. Mother trees identified as *new* are unidentified source trees. See the “Material and methods” section for further details.

<sup>4</sup> Geographic coordinates, in UTM, of the seed-plots, therefore of the seeds.

**Table S3:** Seed sampling scheme by microhabitat for genetic analyses

| Microhabitat <sup>†</sup>      | TF  | TM | F  | N  | P  | R | S | G |
|--------------------------------|-----|----|----|----|----|---|---|---|
| N seeds collected <sup>1</sup> | 514 | 58 | 29 | 19 | 19 | 3 | 3 | 0 |
| N seeds genotyped <sup>2</sup> | 143 | 57 | 29 | 19 | 19 | 3 | 3 | 0 |
| N endocarps <sup>3</sup>       | 134 | 55 | 25 | 17 | 17 | 3 | 3 | 0 |

<sup>†</sup> See Supplementary Material 1 for a detailed description of the microhabitats

<sup>1</sup> Total number of seeds collected in seed-plots

<sup>2</sup> Number of seeds selected for microsatellite genotyping

<sup>3</sup> Final number of endocarps analysed after accounting for microsatellite amplification failure

**Table S4:** Summary data on birds' visitation rate and seed contribution to the seed-plots of *T. baccata* female trees at our study site. Female trees neither observed nor contributing seeds are not included.

| Female tree | Visitation rate <sup>1</sup> | Contributed seeds |
|-------------|------------------------------|-------------------|
| C004        | not observed                 | 1                 |
| C006        | 0.5                          | 0                 |
| C007        | 5.83                         | 29                |
| C010        | 5.08                         | 40                |
| C017        | 0.5                          | 6                 |
| C021        | 1.03                         | 7                 |
| C023        | 0.46                         | 18                |
| C024        | 2.01                         | 61                |
| C025        | 1.52                         | 5                 |
| C026        | not observed                 | 4                 |
| C033        | not observed                 | 1                 |
| C111        | not observed                 | 3                 |

<sup>1</sup> Mean number of bird visits per hour

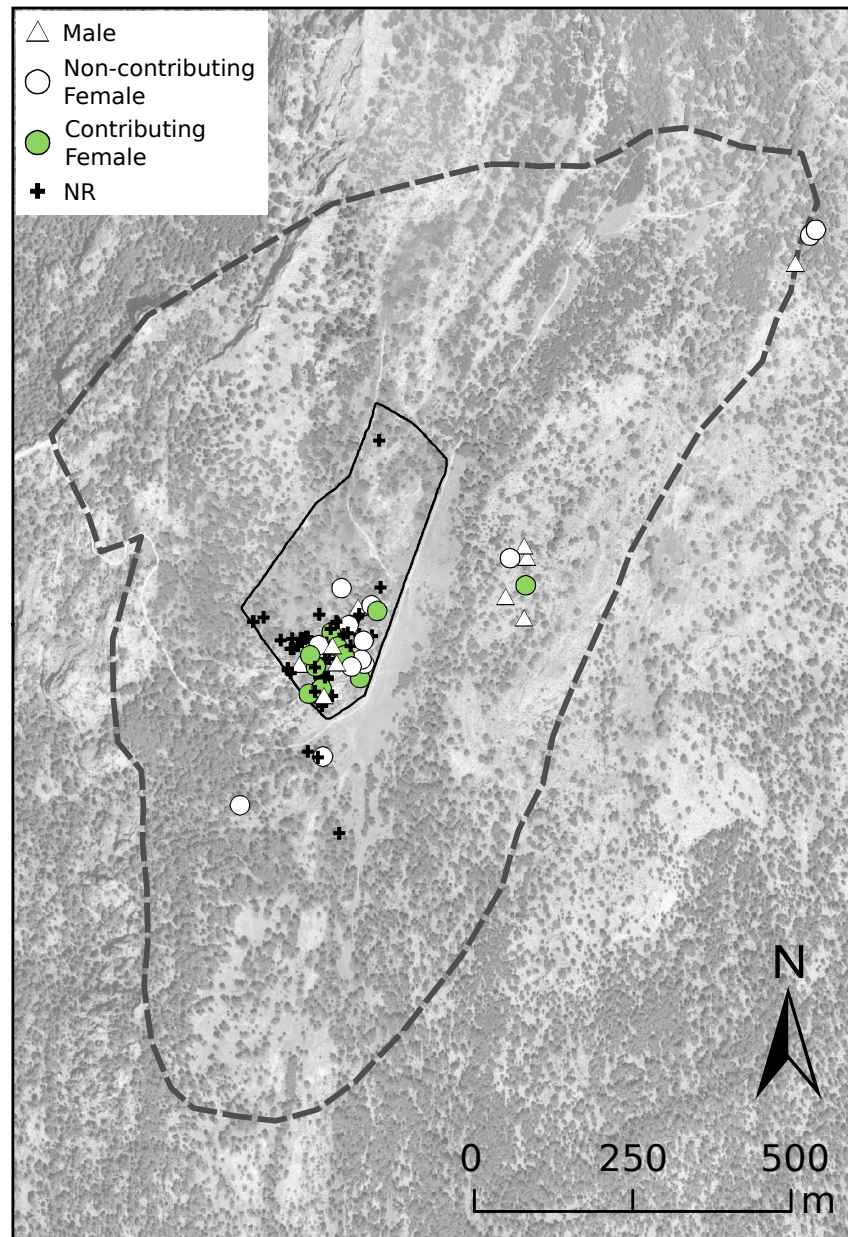

**Figure S1:** Map of the study site indicating the location of the *Taxus baccata* trees sampled within the fenced area (black line) and the additional area explored (dotted line). Green circle: *Taxus baccata* female trees contributing seeds in seed-plots; white circle: *Taxus baccata* female trees not contributing seeds in seed-plots; white triangle: *Taxus baccata* male trees; black cross: non-reproductive *Taxus baccata* individuals.



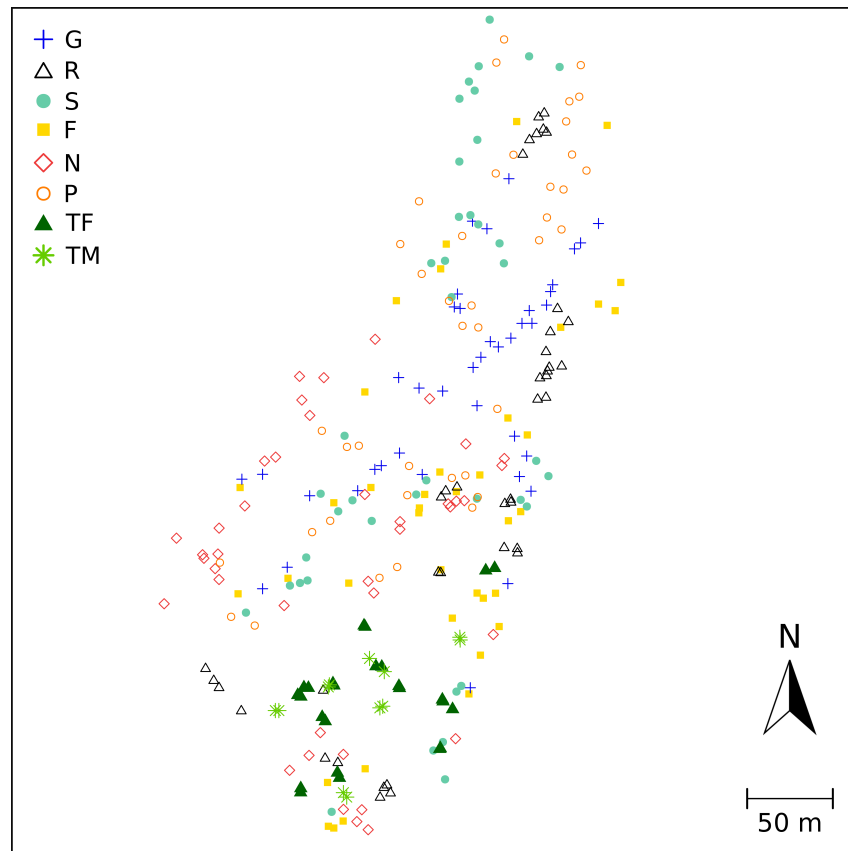

**Figure S2:** Spatial distribution of the seed-plots within the studied population (inside the fence as in Fig. S1) and their microhabitat. G: open ground; R: rock; S: shrub; F: fleshy-fruited tree; N: non fleshy-fruited tree; P: pine tree; TF: *Taxus baccata* female tree; TM: *Taxus baccata* male tree (see Supplementary Material 1 for a detailed description of the microhabitats).

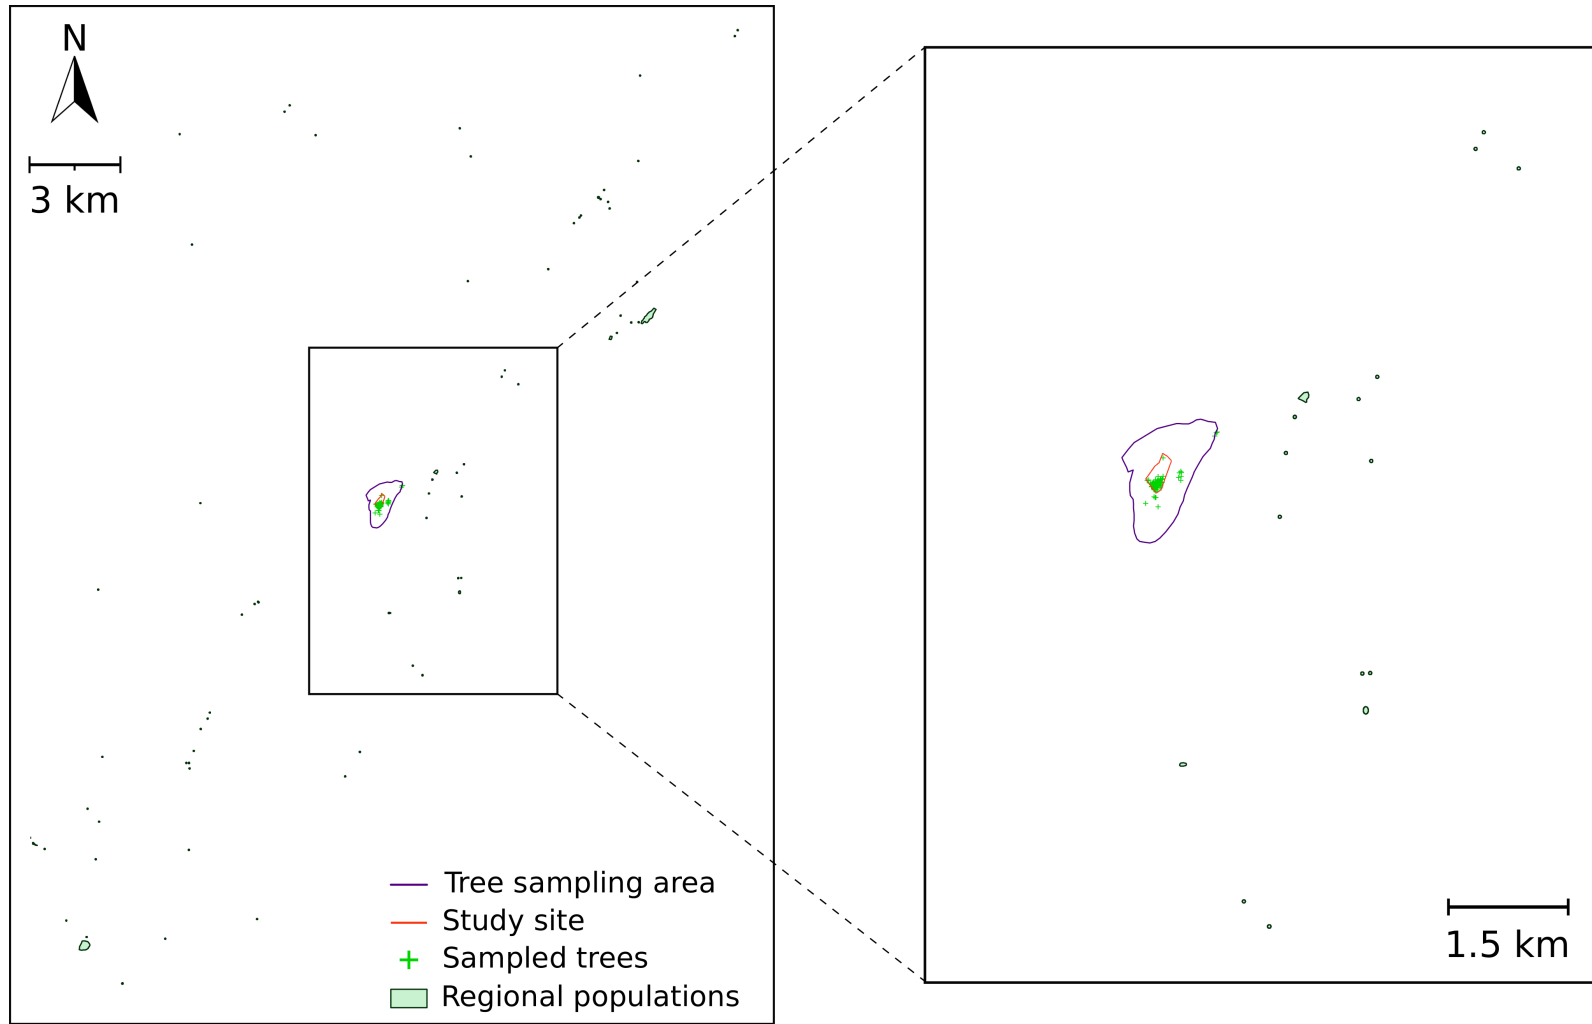

**Figure S3:** Regional map of *Taxus baccata*. Source: Parque Natural de Las Sierras de Cazorla, Segura y Las Villas.

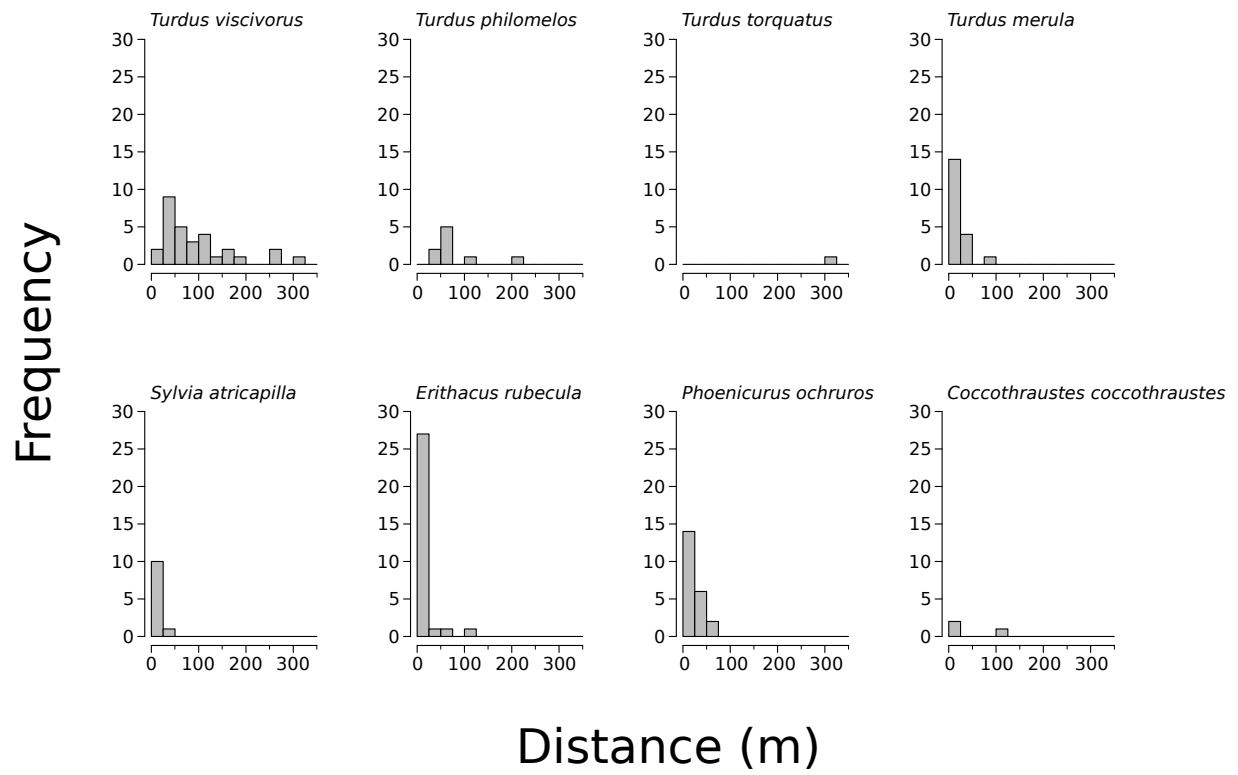

**Figure S4:** Frequency distribution of flight distances observations for individual bird species at the study site.

## SI-1 Microhabitats

Given the type of soil and the vegetation cover, we defined the following microhabitat categories for seed sampling:

- 1) TF: “*Taxus baccata* female,” beneath a female conspecific tree;
- 2) TM: “*Taxus baccata* male,” beneath a male conspecific tree;
- 3) S: “shrub,” beneath an individual of a woody species <1.50 m in height (e.g. *Rosa* spp.);
- 4) F: “fleshy-fruited tree,” beneath a tree >1.50 m in height, other than the yew, that produce fleshy fruits (e.g. *Prunus mahaleb* L.);
- 5) N: “non-fleshy-fruited trees,” beneath a tree >1.50 m of a non fleshy-fruited species (e.g. *Quercus* spp.);
- 6) P: “pine,” beneath *Pinus nigra* subsp. *salzmannii*;
- 7) G: “open ground,” deep soil with cover of non-woody vegetation (pasture) or barren soil with gravel under 25 cm<sup>2</sup>;
- 8) R: “rock,” including stones on soil, boulders, and rock substrates of at least 25 cm<sup>2</sup>.

## SI-2 Bird watching protocol

Bird watching was conducted from hides under nearby trees 40–50 m away and with the help of  $8 \times 40$  binoculars (Nikon, Monarch). We followed each individual bird from the moment it entered a focal tree and until it stopped on a first perch or until out of view. We recorded the following data whenever possible: (1) bird species; (2) flight distance to first perch; and (3) identity of first perch after leaving the focal tree (for distance validation purposes). The flight distances to the first perch were estimated visually and validated a posteriori (see “Trees and seed sampling” section for more information).

Prior to bird observations, all seed-plots and *Taxus baccata* trees in the study population were mapped. When flights were recorded between any two georeferenced points, we compared afterwards the value estimated from direct observation with the actual Euclidean distance. Moreover, to avoid distance estimates bias towards short distances, we accounted for birds that flew out of view; these observations represented 6.4% (8 out of 125) of all the recorded distances. When in the field, we estimated that these birds had flown a minimum distance of 100 m. We thus picked a random distance between 100 m and 350 m (see Godoy & Jordano, 2001; Martínez *et al.*, 2008, for dispersal kernel estimates of a similar assemblage of species).

## References

- Godoy, J. A. & Jordano, P. (2001). Seed dispersal by animals: exact identification of source trees with endocarp DNA microsatellites. *Molecular Ecology*, **10**, 2275–2283.
- Martínez, I., García, D. & Obeso, J. R. (2008). Differential seed dispersal patterns generated by a common assemblage of vertebrate frugivores in three fleshy-fruited trees. *Ecoscience*, **15**, 189–199.
